# Supplementary material
Source: HighWire-hosted journal article supplement (https://srh.bmj.com/highwire/filestream/138363/field_highwire_adjunct_files/0/jfprhc-2013-100624supp.pdf)
Supplement: jfprhc-2013-100624supp.pdf [file jfprhc-2013-100624supp.pdf]

# Statement on combined hormonal contraceptives containing third- or fourth-generation progestogens or cyproterone acetate, and the associated risk of thromboembolism

## Cosignatories' Affiliations and Conflict of Interest (COI) Declarations

| Name/Affiliation                                                                                                                      | COI Declaration                                                                                                                                                                       |
|---------------------------------------------------------------------------------------------------------------------------------------|---------------------------------------------------------------------------------------------------------------------------------------------------------------------------------------|
| Johannes Bitzer<br>Department of Obstetrics and Gynaecology,<br>University Hospital Basel,<br>Basel, Switzerland                      | Recipient of grants and honoraria for research projects, educational lectures and consultant service from Bayer Health Care, Merck (MSD), Gedeon Richter, Pfizer.                     |
| Jean-Jacques Amy<br><i>European Journal of Contraception and Reproductive Health Care</i> , Brussels, Belgium                         | Read a paper at a meeting organised by MSD; the fee has been donated to a non-governmental organisation.                                                                              |
| Rob J C M Beerthuizen<br>Dutch Foundation for Contraception                                                                           | Recipient of grants and honoraria for research projects, educational lectures and consultant service from Bayer Health Care, Merck (MSD), Pantarhei Bioscience, Prosan International. |
| Martin Birkhäuser<br>Department of Obstetrics and Gynaecology,<br>University Women's Hospital Bern, Basel,<br>Switzerland             | Member of advisory boards of and/or has received honoraria for lectures from AMGEN, MSD, Daiiji Sankyo, Bayer Schering, Abbott, Novartis.                                             |
| Teresa Bombas<br>Obstetric Service, Centro Hospitalar da<br>Universidade de Coimbra, Coimbra, Portugal                                | Recipient of grants and honoraria for research projects, educational lectures and consultant service from Bayer Health Care, Merck Sharp and Dohme (MSD) and AffinitésSanté.          |
| Mitchell Creinin<br>Department of Obstetrics and Gynecology,<br>University of California, Davis Health<br>System, Sacramento, CA, USA | Consultant for Merck, Danco and received research support from Medicines360.                                                                                                          |
| Philip D Darney<br>Obstetrics, Gynecology and Reproductive<br>Sciences, University of California,<br>San Francisco, CA, USA           | Consultant for Merck, Cermed and Medicines360 and received research support from Medicines360.                                                                                        |
| Lisa Ferreira Vicente<br>Child and Maternal Health Department,<br>Directorate-General of Health, Portugal                             | Recipient of grants and honoraria for research projects, educational lectures from Organon, Wyeth Lederle Portugal, Schering-Plough, Bayer Health Care, Merck (MSD), BIAL.            |

| <b>Name/Affiliation</b>                                                                                                                                                                              | <b>COI Declaration</b>                                                                                                                                                                                                                                                                                                     |
|------------------------------------------------------------------------------------------------------------------------------------------------------------------------------------------------------|----------------------------------------------------------------------------------------------------------------------------------------------------------------------------------------------------------------------------------------------------------------------------------------------------------------------------|
| <p>Kristina Gemzell-Danielsson<br/>Division of Obstetrics and Gynecology,<br/>Department of Women's and Children's<br/>Health, Karolinska Institutet, University<br/>Hospital, Stockholm, Sweden</p> | <p>Recipient of grants and honoraria for research projects, educational lectures and consultant services from Bayer Health Care, Merck (MSD), Gedeon Richter, HRA-Pharma.</p>                                                                                                                                              |
| <p>Bruno Imthurn<br/>Klinik Gyn Endokrinologie und<br/>Reproduktionsmedizin, Universitätsspital<br/>Zürich, Zurich, Switzerland</p>                                                                  | <p>No conflicts of interest to declare.</p>                                                                                                                                                                                                                                                                                |
| <p>Jeffrey T Jensen<br/>Department of Obstetrics and Gynecology,<br/>Oregon Health and Science University,<br/>Portland, OR, USA</p>                                                                 | <p>Consultant and serves on advisory boards for Bayer Healthcare, HRA Pharma, Merck and the Population Council. Speaker for Bayer Healthcare. Recipient of research support from Abbott Pharmaceuticals, Bayer Healthcare, M-360, the Population Council, Agile Pharmaceuticals and the National Institutes of Health.</p> |
| <p>Andrew M Kaunitz<br/>Department of Obstetrics and Gynecology,<br/>University of Florida College of Medicine,<br/>Jacksonville, FL, USA</p>                                                        | <p>Recipient of grants, consulting fees, honoraria and meeting support from Johnson &amp; Johnson (New Brunswick, NJ, USA), Bayer (Leverkusen, Germany), Merck (Whitehouse Station, NJ, USA) and Teva (Petach Tikva, Israel).</p>                                                                                          |
| <p>Ali Kubba<br/>Department of Obstetrics and Gynaecology,<br/>Guy's and St Thomas' NHS Foundation Trust,<br/>London, UK</p>                                                                         | <p>Recipient of grants and honoraria for research projects, educational lectures and consultant services from Bayer Health Care, Merck (MSD) and Gedeon Richter.</p>                                                                                                                                                       |
| <p>Medard M Lech<br/>Fertility &amp; Sterility Research Centre,<br/>Warsaw, Poland</p>                                                                                                               | <p>Recipient of scholarly grants from Gedeon Richter.</p>                                                                                                                                                                                                                                                                  |
| <p>Diana Mansour<br/>NHS Newcastle and North Tyneside,<br/>Community Health, New Croft Centre,<br/>Newcastle upon Tyne, UK</p>                                                                       | <p>Recipient of research grants and honoraria for attending advisory board meetings, developing and delivering educational presentations from Astellas, Bayer plc, Consilient Healthcare, HRA Pharma and MSD.</p>                                                                                                          |
| <p>Gabriele Merki<br/>Klinik für Gyn Endokrinologie und<br/>Reproduktionsmedizin, Universitätsspital<br/>Zürich, Zurich, Switzerland</p>                                                             | <p>Financial relationships (lecturer, member of advisory boards and/or consultant) with Bayer-Schering Pharma, Merck Sharp and Dohme and Amgen AG in last 5 years.</p>                                                                                                                                                     |

| Name/Affiliation                                                                                                                                                                                                                                       | COI Declaration                                                                                                                                                                                                                  |
|--------------------------------------------------------------------------------------------------------------------------------------------------------------------------------------------------------------------------------------------------------|----------------------------------------------------------------------------------------------------------------------------------------------------------------------------------------------------------------------------------|
| <p>Thomas Rabe<br/>Department of Gynaecological Endocrinology and Reproductive Medicine, University Women's Hospital, Medical School Heidelberg, Germany</p>                                                                                           | <p>Recipient of honoraria and travel expenses from Bayer AG, HRA Pharma, MSD and Teva for national and international lectures, advisory boards and consultancy.</p>                                                              |
| <p>Katarina Sedlecki<br/>Institute for Mother and Child Health Care of Serbia, Republic Family Planning Centre, Serbia</p>                                                                                                                             | <p>Recipient of honoraria for giving lectures for various pharmaceutical companies: GlaxoSmithKline, MSD Ltd, Bayer HealthCare and Gedeon Richter.</p>                                                                           |
| <p>David Serfaty<br/>Président de la Société Francophone de Contraception, Paris, France</p>                                                                                                                                                           | <p>Recipient of grants and honoraria for research projects, educational lectures and consultant service from HRA, Conceptus, Gedeon Richter, Bayer.</p>                                                                          |
| <p>Jacques Seydoux<br/>Président de la Société Suisse de Gynécologie, Delémont, Switzerland</p>                                                                                                                                                        | <p>No conflicts of interest to declare.</p>                                                                                                                                                                                      |
| <p>Lee P Shulman<br/>Feinberg School of Medicine of Northwestern University Chicago, Chicago, IL, USA</p>                                                                                                                                              | <p>Recipient of grants and honoraria for research projects, educational lectures and consulting services from Bayer Health Care, Teva, Merck (MSD), Theramex, Watson and Besins.</p>                                             |
| <p>Regine Sitruk-Ware<br/>Rockefeller University and The Population Council, New York, NY, USA</p>                                                                                                                                                     | <p>Member of an Advisory Board for Bayer and for Merck, and lectured for Teva.</p>                                                                                                                                               |
| <p>Sven O Skouby<br/>Department of Obstetrics/Gynaecology, Herlev Hospital, Herlev Ringvej, Denmark, Faculty of Health Sciences, University of Copenhagen, and Department of Thrombosis Research, Esbjerg, University of Southern Denmark, Denmark</p> | <p>Consultant for manufacturers of hormonal products including contraceptives and postmenopausal therapies.</p>                                                                                                                  |
| <p>Anne Szarewski<br/>Centre for Cancer Prevention, Wolfson Institute of Preventive Medicine, Queen Mary, University of London, London, UK</p>                                                                                                         | <p>Recipient of honoraria, conference sponsorship and consultancy fees from various pharmaceutical companies including Bayer HealthCare Pharmaceuticals and MSD.</p>                                                             |
| <p>James Trussell<br/>Office of Population Research, Wallace Hall, Princeton University, Princeton, NJ, USA</p>                                                                                                                                        | <p>Member of Merck's Global Advisory Board and consultant on health economics projects for Bayer.</p>                                                                                                                            |
| <p>Carolyn Westhoff<br/>Department of Obstetrics and Gynecology, Columbia University, College of Physicians and Surgeons, Columbia University, New York, NY, USA</p>                                                                                   | <p>Research: National Institutes of Health only (no industry-funded research). Consultant/advisor to Agile Therapeutics. DSMB member for Merck and Bayer Phase 4 studies. Editor of <i>Contraception</i> (Elsevier journal).</p> |
